# Supplementary material for: Systemic Inflammation Precedes Microalbuminuria in Diabetes
Source: PubMed Central journal article supplement — Kidney Int Rep. 2019 Jun 21;4(10):1373–86. doi: 10.1016/j.ekir.2019.06.005 (PMC6829192; doi:10.1016/j.ekir.2019.06.005), 2019-06-21
Supplement: mmc1.pdf [file mmc1.pdf]

## Supplemental Material Legends

**Supplementary Figure 1:** Flow diagram of the ROADMAP and OFU studies and illustration of participant inclusion in the current study.

**Supplementary Figure 2:** Mediation analysis of risk for microalbuminuria development with inclusion of CXCL-16, TGF- $\beta$ 1 and angiotensin-2.

**A-C:** Tested mediators: changes in baseline serum TGF- $\beta$ 1 and angiotensin-2. Independent variable: changes in CXCL-16.

**A:** the first step was the demonstration that higher CXCL-16 levels had a measurable impact on microalbuminuria development after accounting for baseline risk covariates.

**B1 and B2:** second, we checked if mediator changes (TGF- $\beta$ 1, angiotensin-2) correlated with higher risk for microalbuminuria development, after accounting for baseline risk covariates.

**C1 and C2:** subsequently, we calculated the influence of higher CXCL-16 levels on the tested mediators (TGF- $\beta$ 1, angiotensin-2). Finally, we jointly calculated the influence of the mediator on microalbuminuria development, after accounting for baseline risk covariates, and the direct effects of the independent variable (CXCL-16).

This last step shows that higher serum TGF- $\beta$ 1 partially mediates (20%,  $p=0.003$  for the average causal mediation effect (ACME)) and angiotensin-2 partially mediates (9%,  $p=0.007$  for the ACME) the original effect of CXCL-16 on microalbuminuria development and, consequently, CXCL-16 remains directly associated with microalbuminuria development in an independent manner (characterizing incomplete mediation).

**D-F:** Tested mediators: changes in baseline serum CXCL-16 and angiotensin-2. Independent variable: changes in TGF- $\beta$ 1.

**D:** the first step was the demonstration that higher TGF- $\beta$ 1 levels had a measurable impact on microalbuminuria development after accounting for baseline risk covariates.

**E1 and E2:** second, we checked if mediator changes (CXCL-16 and angiotensin-2) correlated with microalbuminuria development, after accounting for baseline risk covariates.

**F1 and F2:** third, we calculated the influence of higher CXCL-16 on the tested mediators (TGF- $\beta$ 1, angiotensin-2). Finally, we jointly calculated the influence of the mediator on microalbuminuria development, after accounting for baseline risk covariates, and the direct effects of the independent variable (TGF- $\beta$ 1).

This last step shows that higher serum CXCL-16 and angiotensin-2 levels don't mediate the original effect of TGF- $\beta$ 1 on microalbuminuria development and, consequently, TGF- $\beta$ 1 remains directly associated with microalbuminuria development in an independent manner.

**G-I:** Tested mediators: changes in baseline serum CXCL-16 and TGF- $\beta$ 1. Independent variable: changes in angiotensin-2.

**G:** the first step was the demonstration that higher angiotensin-2 levels had a measurable impact on microalbuminuria development after accounting for baseline risk covariates.

**H1 and H2:** second, we checked if mediator changes (CXCL-16 and TGF- $\beta$ 1) correlated with microalbuminuria development, after accounting for baseline risk covariates.

**I1 and I2:** third, we calculated the influence of higher angiotensin-2 on the tested mediators (CXCL-16 and TGF- $\beta$ 1). Subsequently, we jointly calculated the influence of the mediator on microalbuminuria development, after accounting for baseline risk covariates, and the direct effects of the independent variable (angiotensin-2).

This last step shows that higher serum CXCL-16 partially mediates (10%,  $p < 0.001$  for the ACME) and TGF- $\beta$ 1 doesn't mediate (0%,  $p < 0.001$  for the ACME) the original effect of angiotensin-2 on microalbuminuria development and, consequently, angiotensin-2 remains directly associated with microalbuminuria development in an independent manner (characterizing incomplete mediation).

**Supplementary Figure 3:** Multilevel mediation analysis of risk for microalbuminuria development with inclusion of the combination of the three markers (CXCL-16, TGF- $\beta$ 1 and angiotensin-2)

**Supplementary Table 1:** Univariable association of individual clinical risk factors (top) and measured biomarkers (bottom) with new-onset microalbuminuria.

**Supplementary Table 2a:** Spearman correlation coefficients between selected serum biomarker levels

**Supplementary Table 2b:** Spearman correlation coefficients between selected serum biomarker concentrations and clinical risk factors

**Supplementary Table 3:** Clinical characteristics of the available datasets at baseline, split by presence or absence of olmesartan in the ROADMAP trial.

**Supplementary Table 4:** Odds ratio (OR) for developing microalbuminuria before and after bootstrapped multivariate regression analysis

**Supplementary Table 5:** Log-rank test of comparing the different quartiles of all 3 biomarkers associated with an increasing incidence of the composite outcome (de novo microalbuminuria).

**Supplementary Table 6:** Calibration and sensitivity analysis of the risk prediction models.

**Supplementary Table 7:** Prediction performance analysis for individual and combined biomarkers

**Supplementary Table 8:** Biomarkers of interest. Relevant clinical studies in patients with early stage cardiovascular disease or cardiovascular risk factors. Supposed pathways and underlying molecular mechanisms.

**Modified SROBE statement**

# ROADMAP

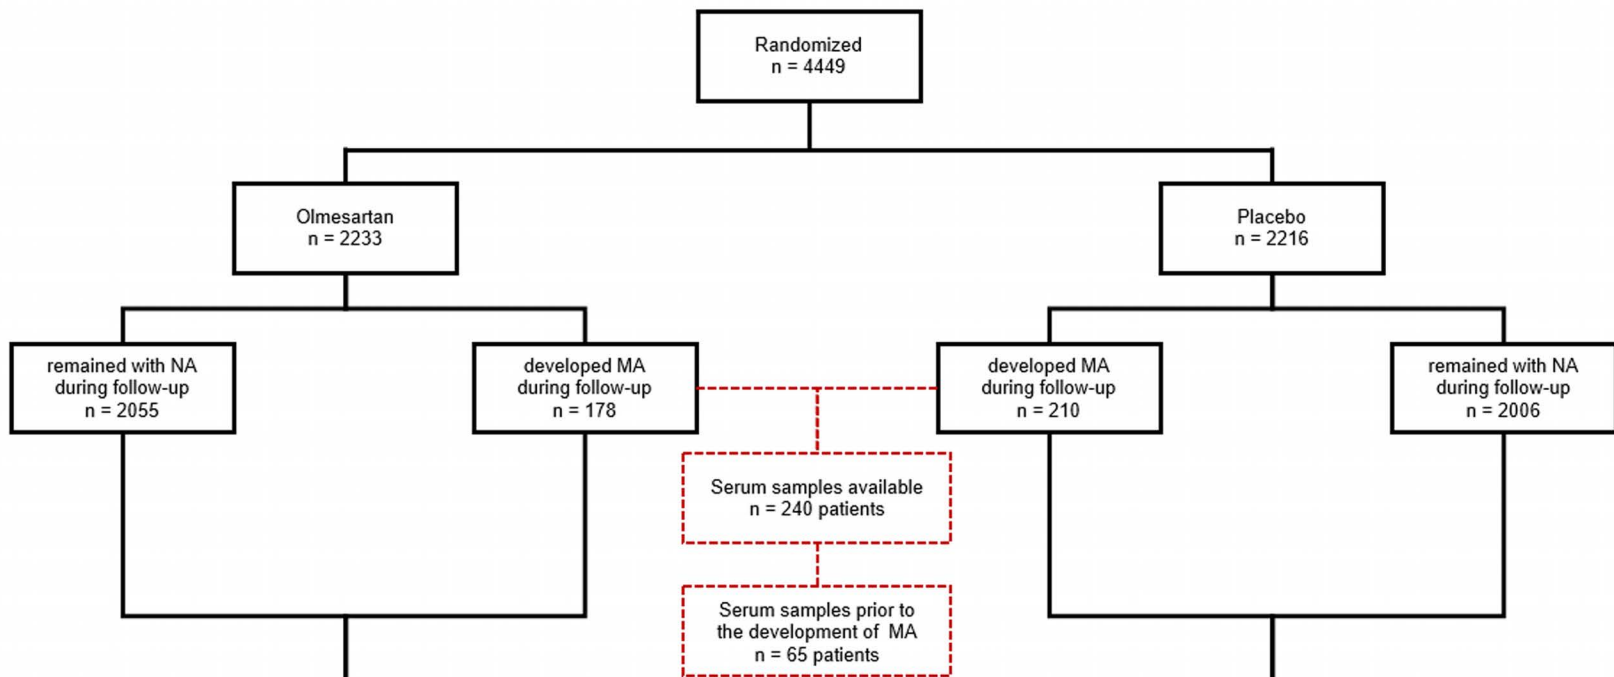

# ROADMAP-OFU

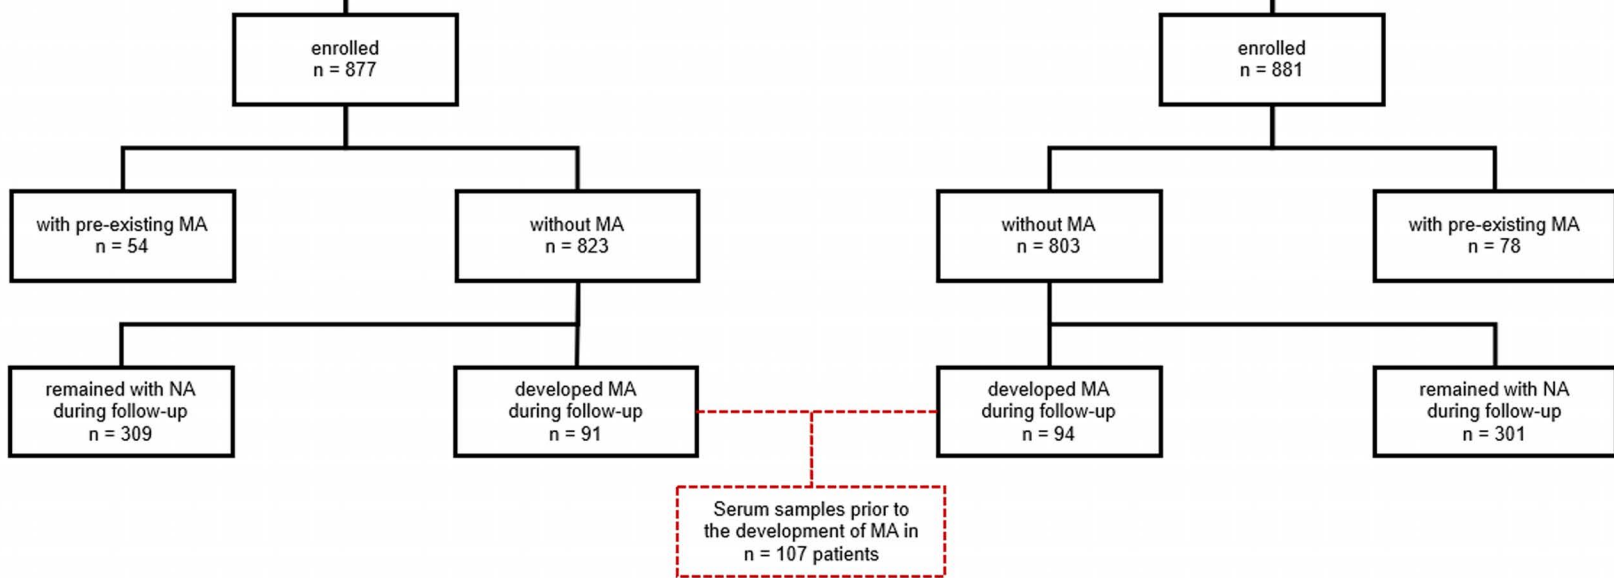

Supplementary Figure 1

**A**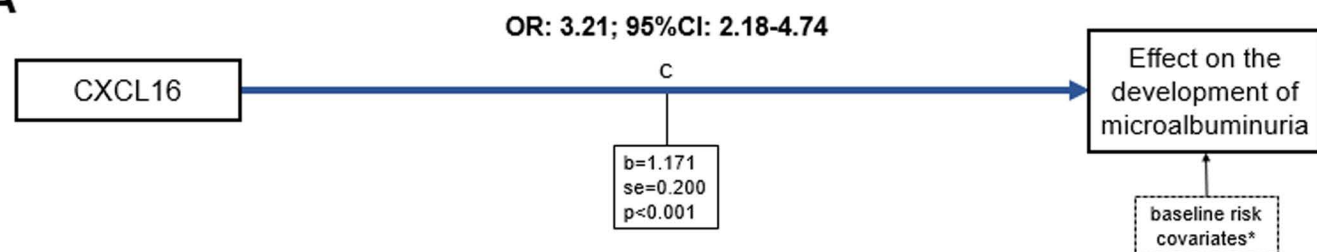**B1**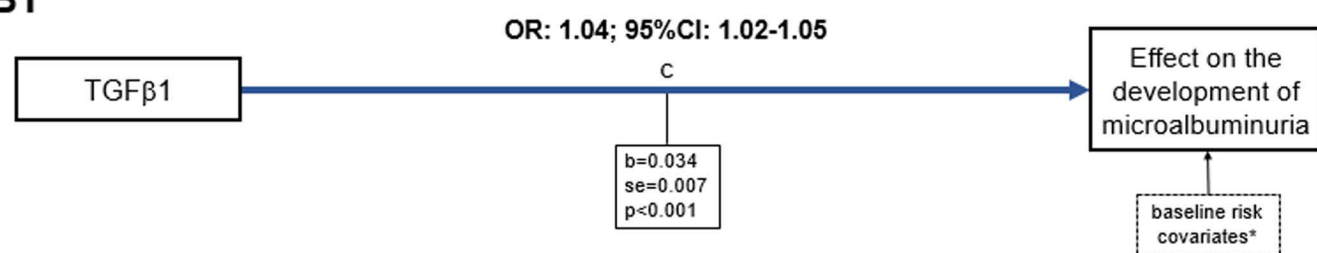**B2**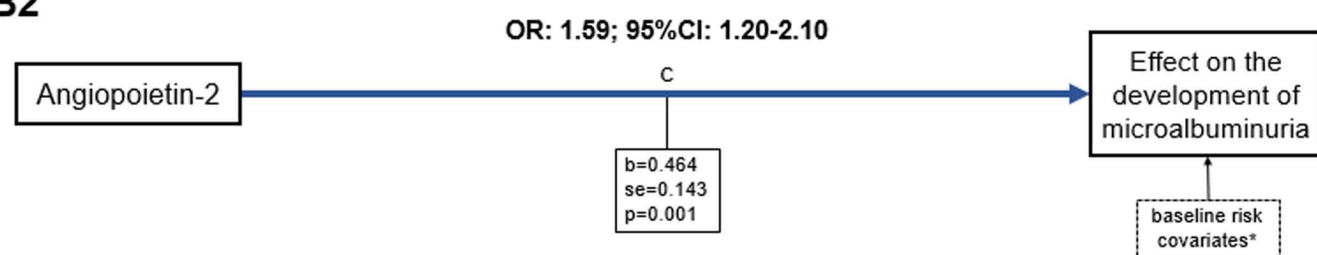**C1**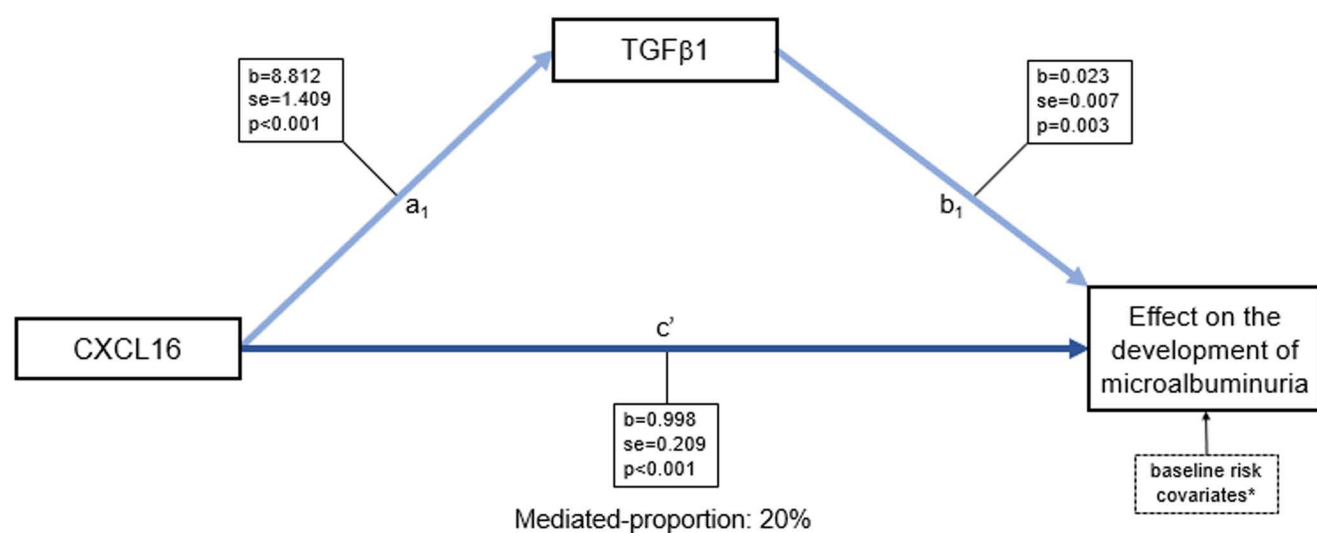**C2**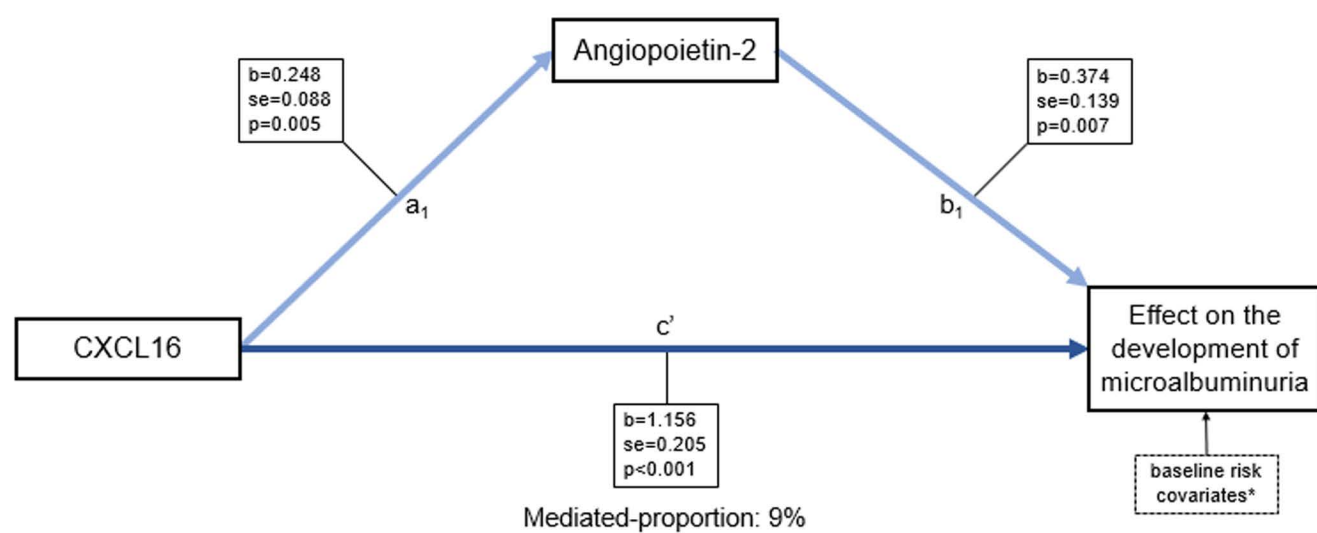

**D**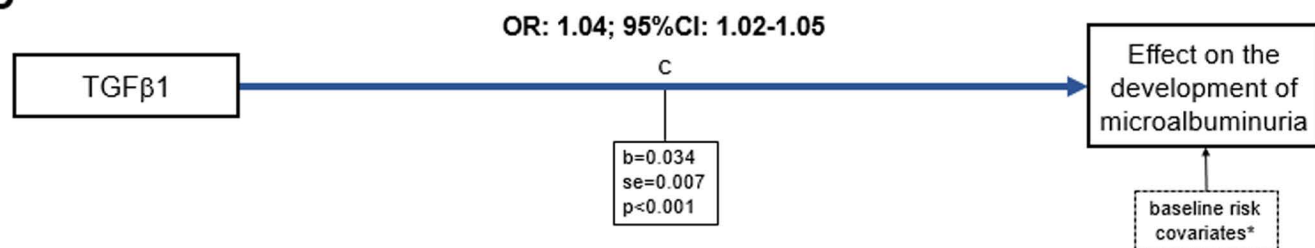**E1**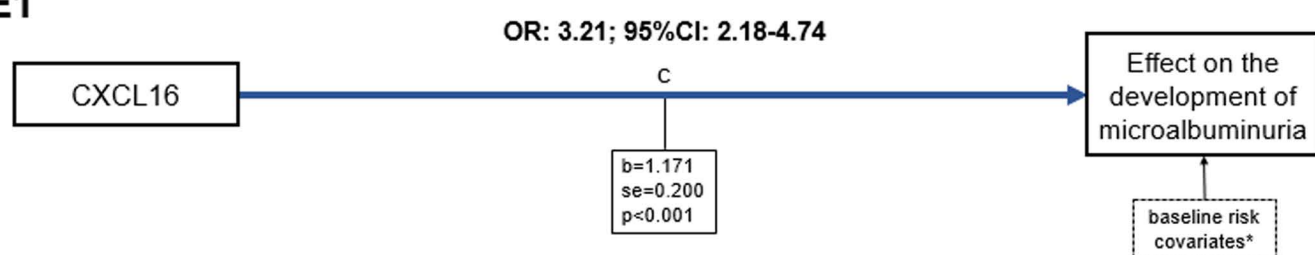**E2**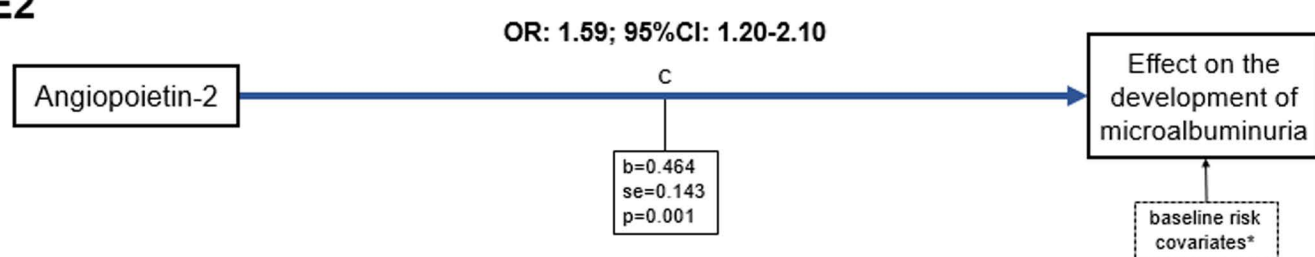**F1**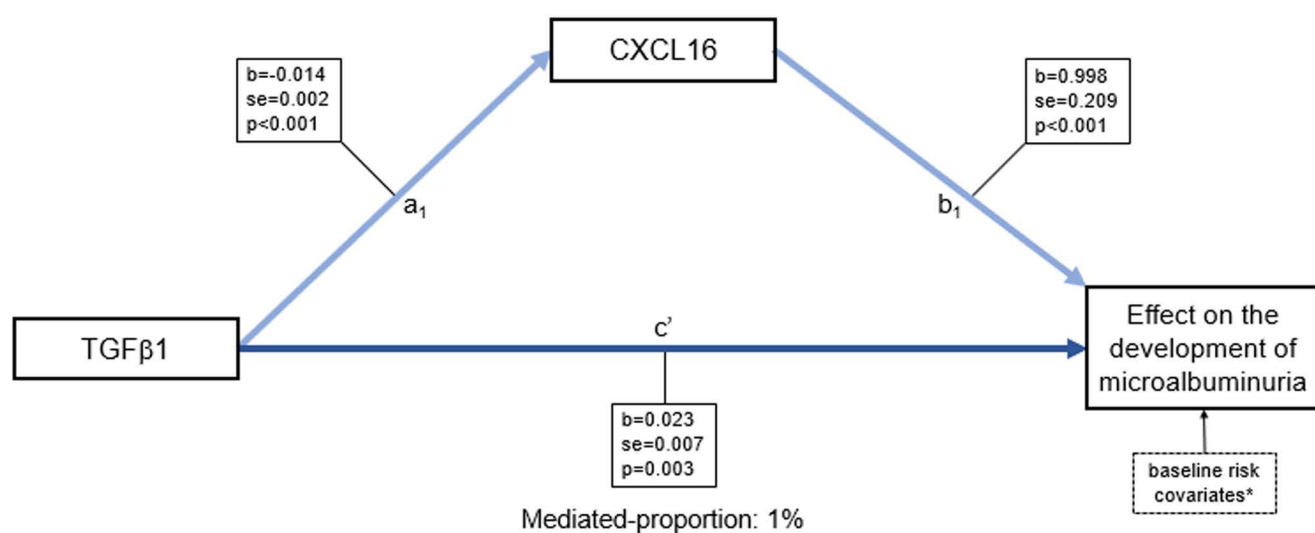**F2**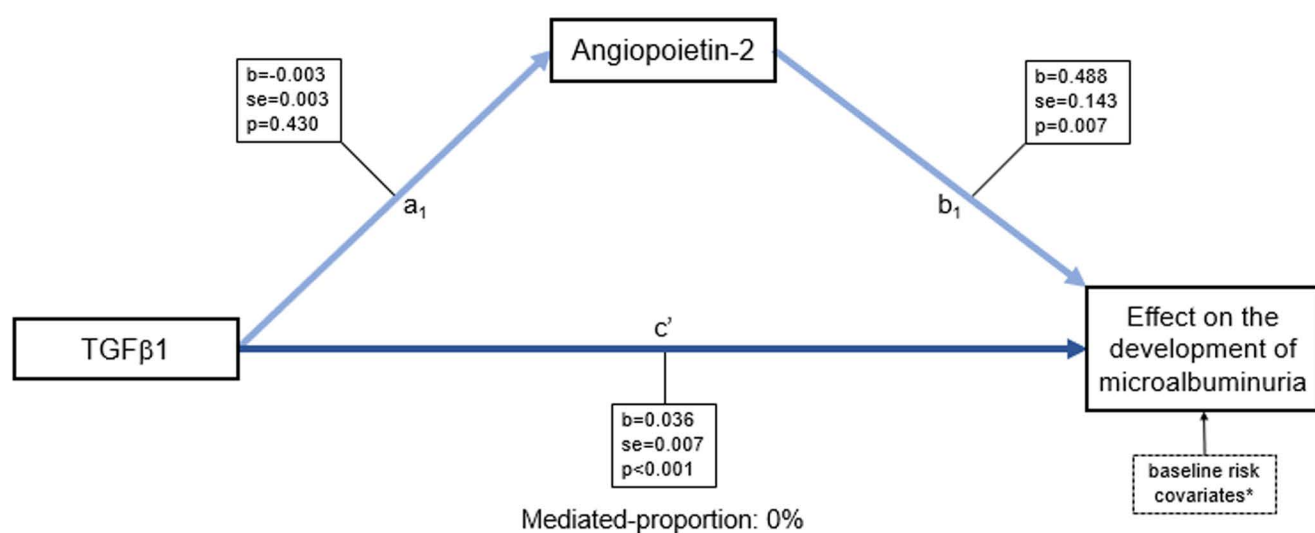

**G**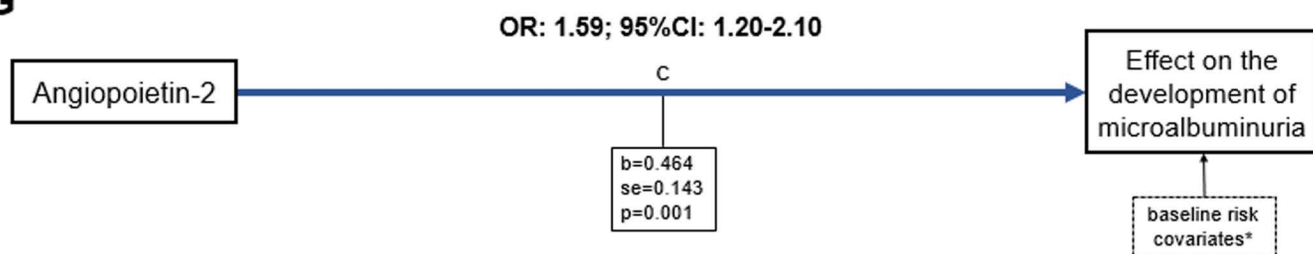**H1**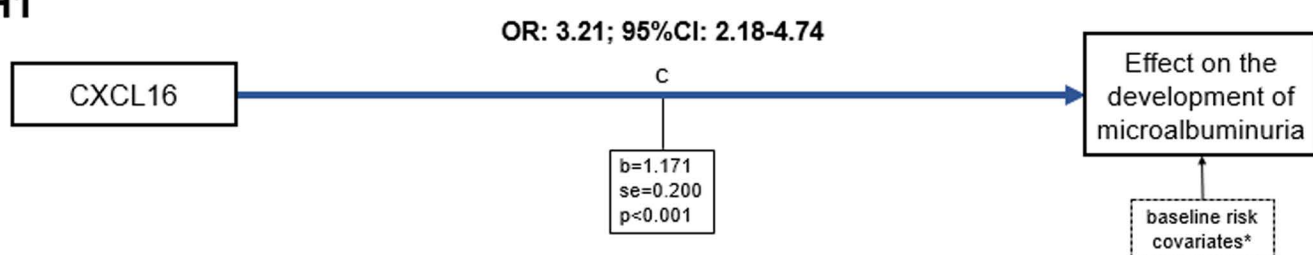**H2**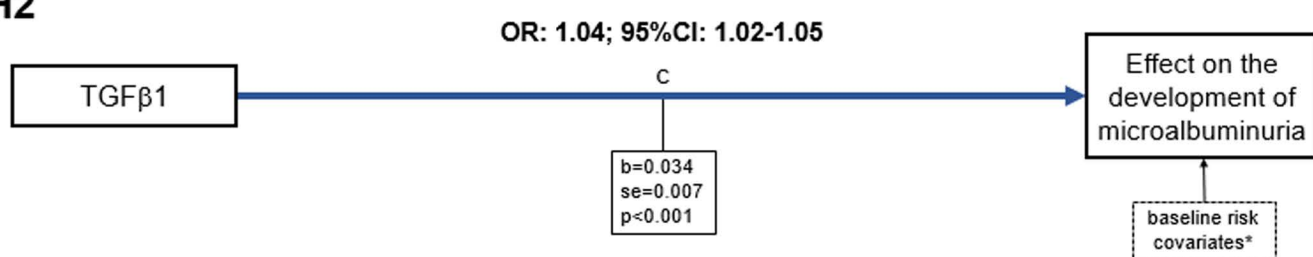**I1**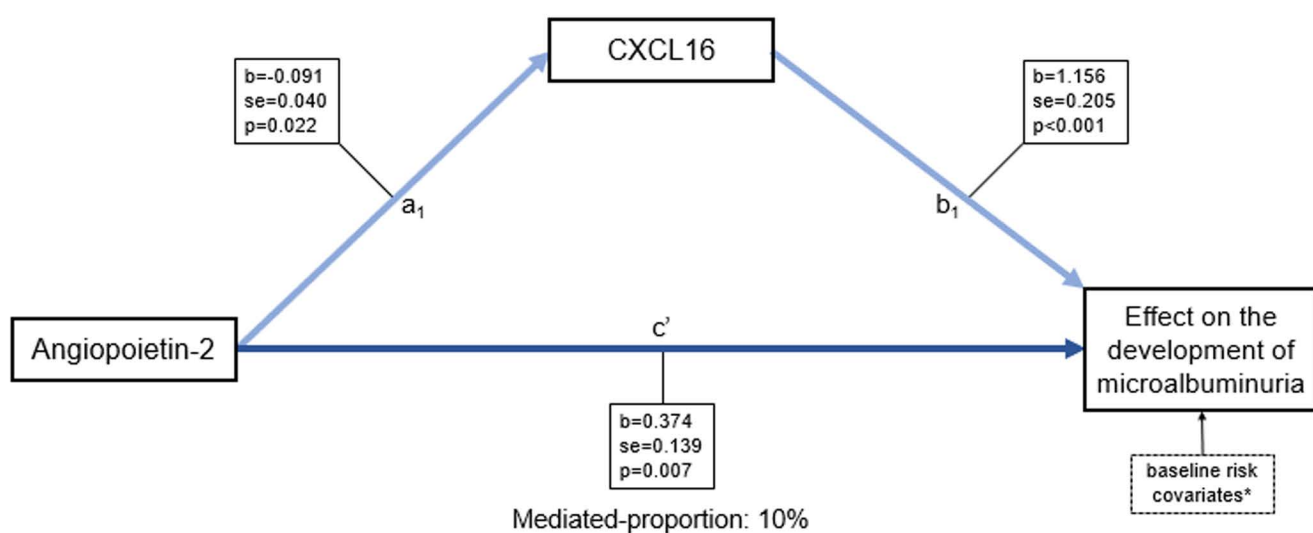**I2**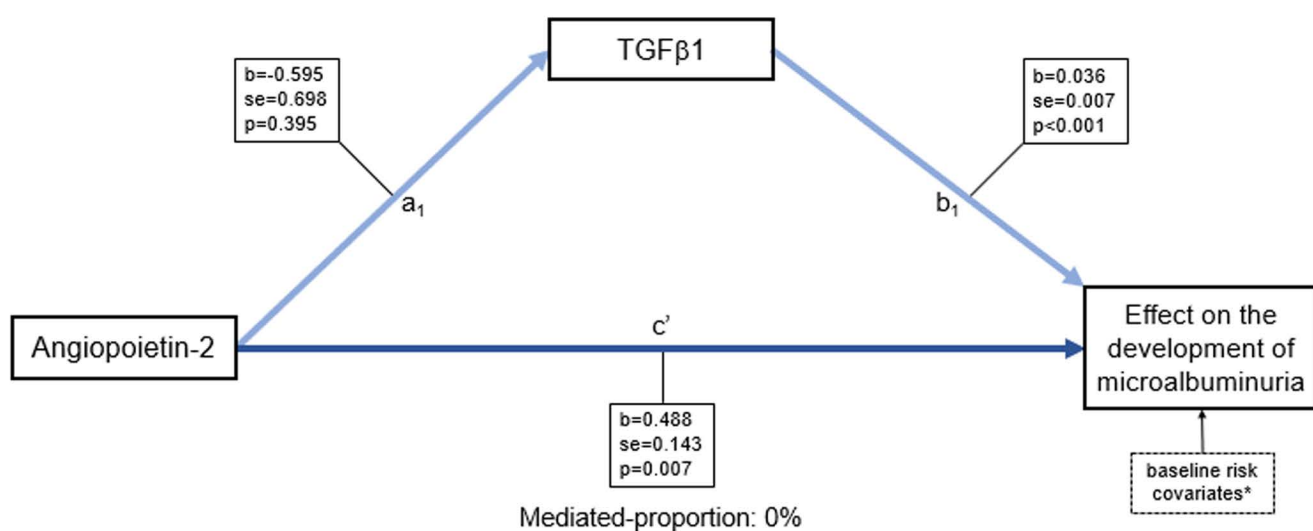

**A**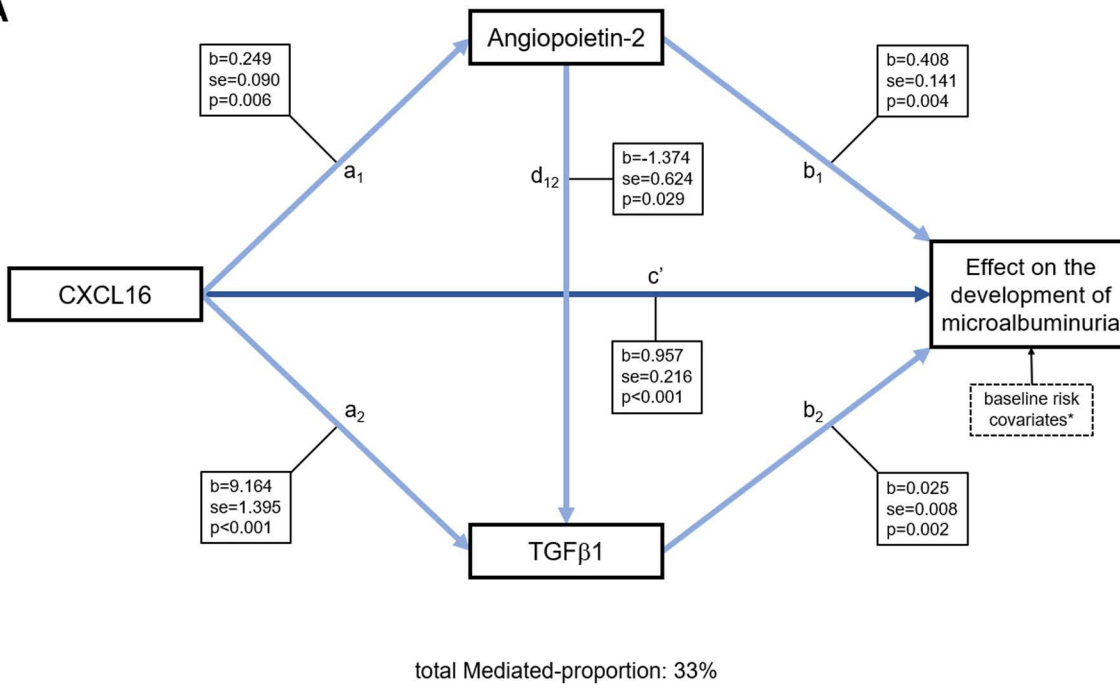**B**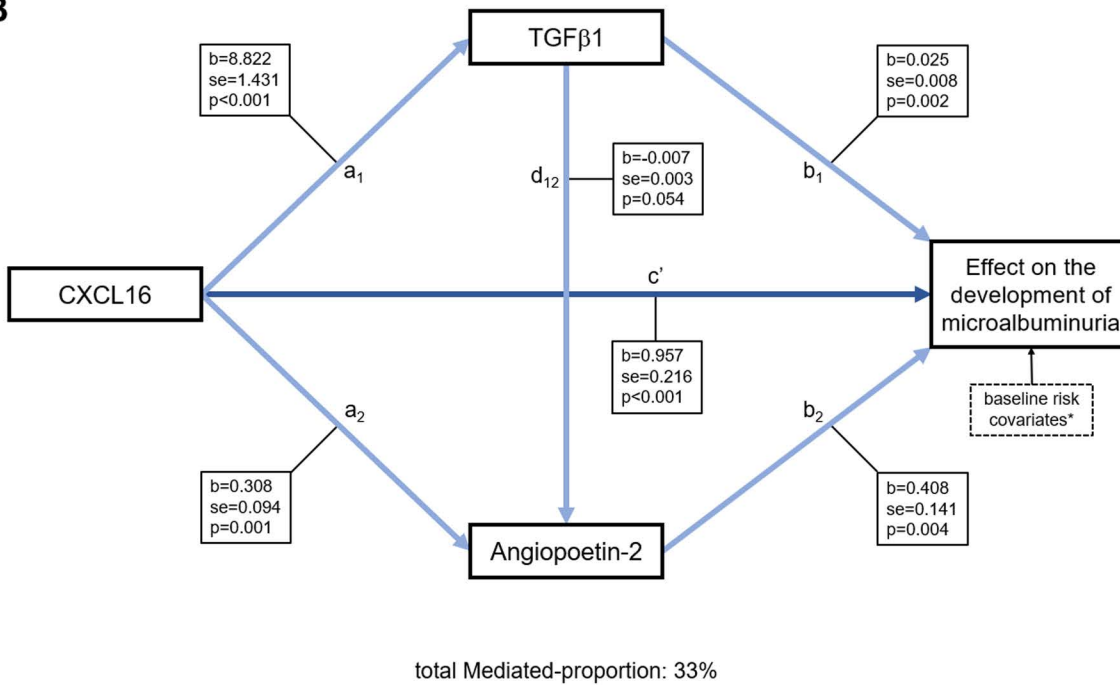



C

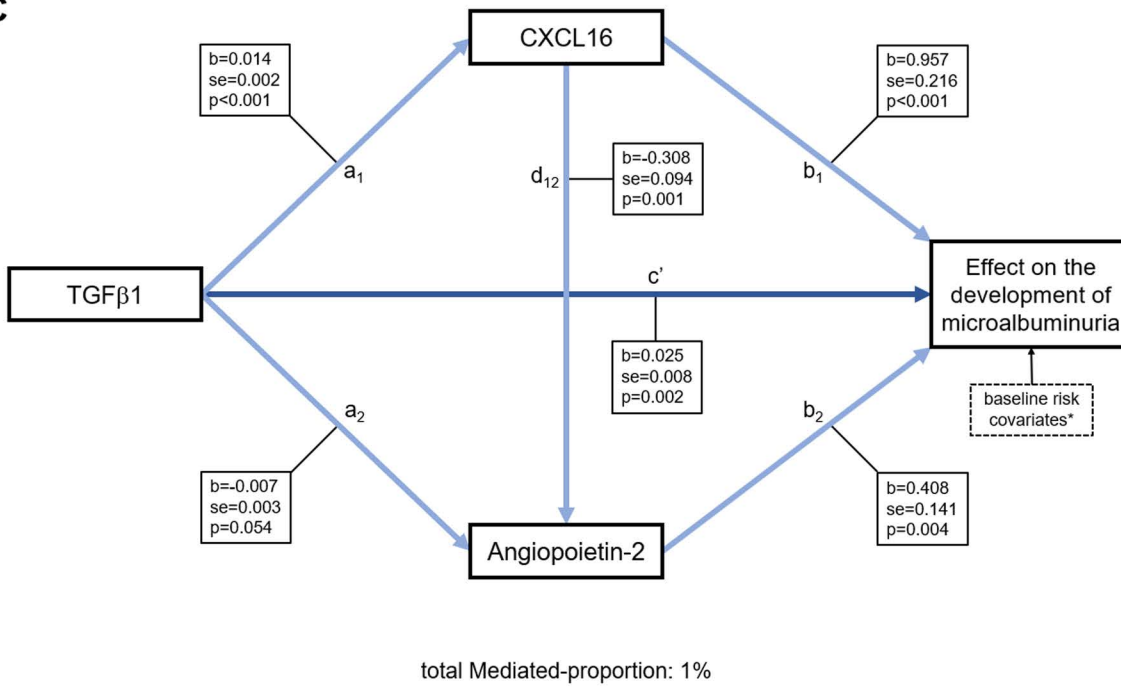

D

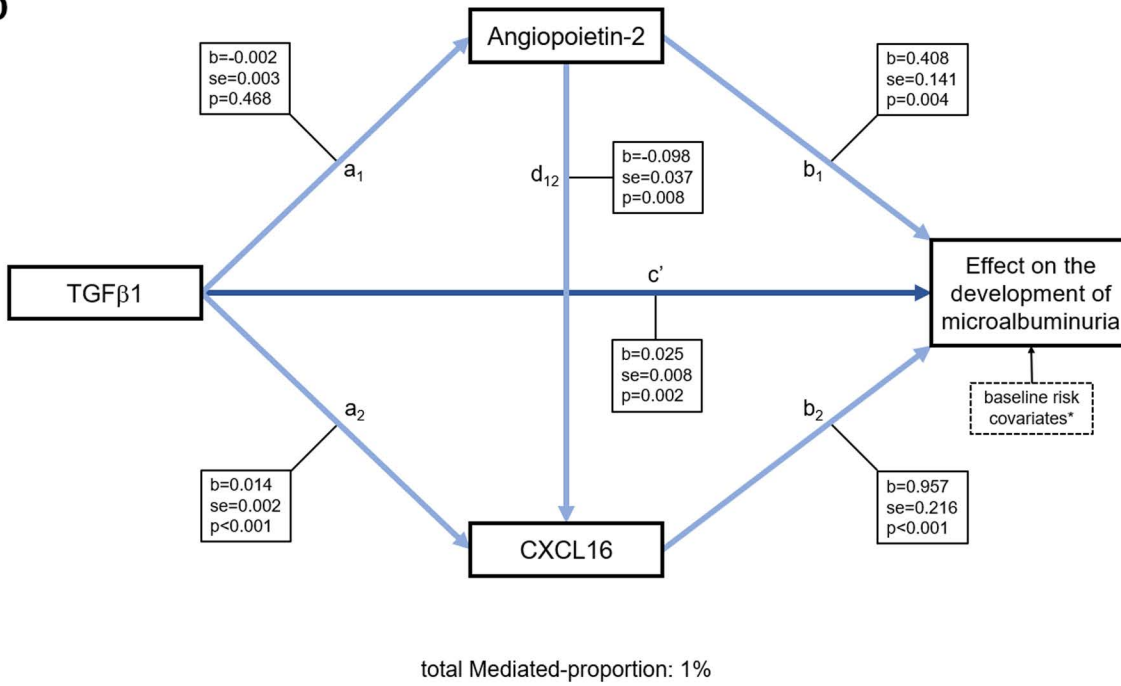

**E**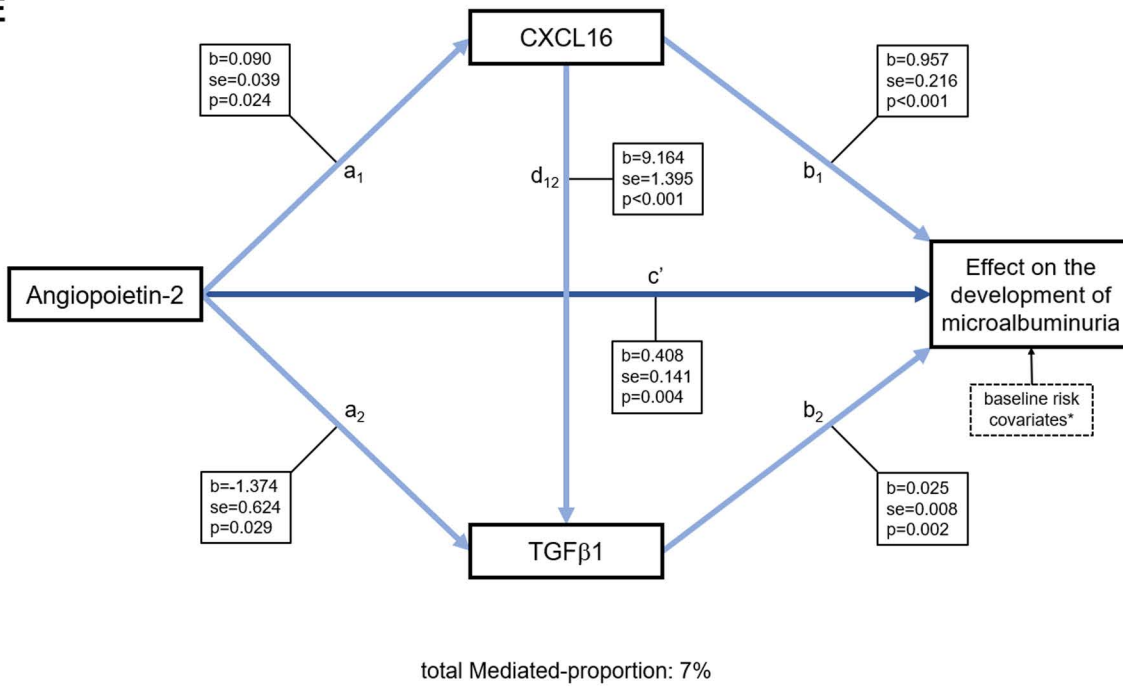**F**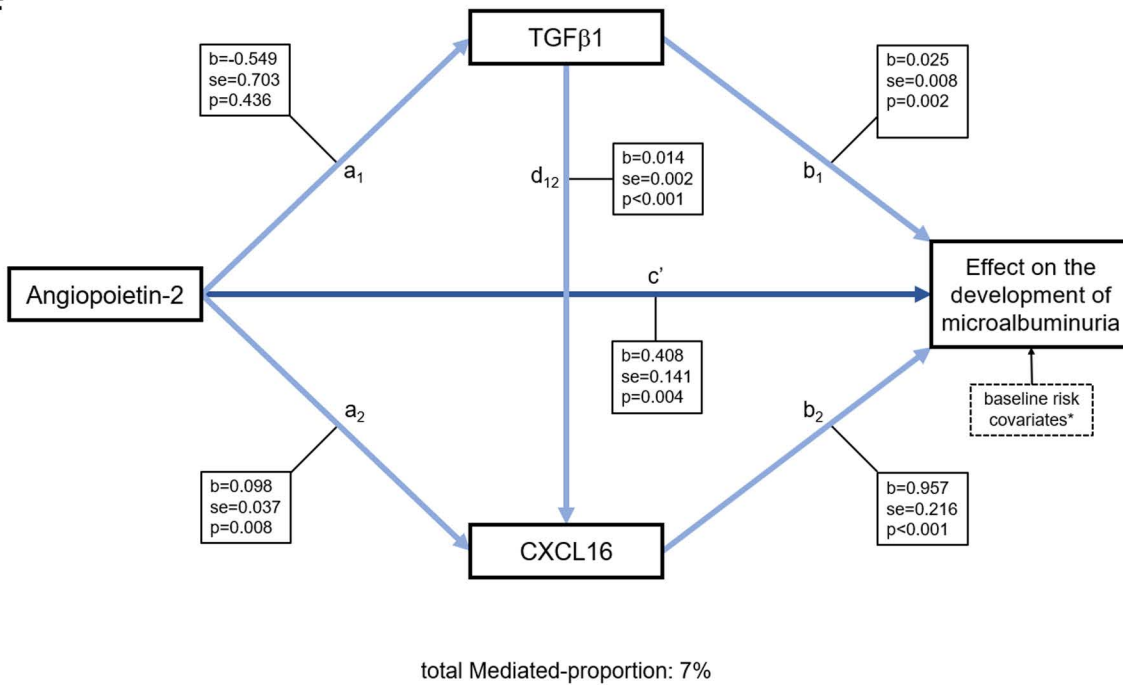

**Supplementary Table 1.** Univariable association of individual clinical risk factors (top) and measured biomarkers (bottom) with new-onset microalbuminuria.

| Clinical Markers                  | AUC   | 95% CI        | p     |
|-----------------------------------|-------|---------------|-------|
| Age                               | 0.529 | 0.469 - 0.589 | 0.343 |
| Male sex                          | 0.489 | 0.430 - 0.549 | 0.727 |
| Tobacco smoking                   | 0.502 | 0.442 - 0.561 | 0.959 |
| Body-mass index                   | 0.483 | 0.423 - 0.543 | 0.585 |
| Systolic blood pressure           | 0.513 | 0.453 - 0.573 | 0.665 |
| Diastolic blood pressure          | 0.475 | 0.415 - 0.535 | 0.412 |
| Mean blood pressure               | 0.491 | 0.431 - 0.551 | 0.769 |
| Estimated GFR                     | 0.486 | 0.427 - 0.546 | 0.656 |
| LDL cholesterol                   | 0.485 | 0.425 - 0.545 | 0.621 |
| HbA <sub>1c</sub>                 | 0.507 | 0.447 - 0.567 | 0.811 |
| Urine albumin-to-creatinine ratio | 0.554 | 0.495 - 0.614 | 0.075 |
| Cardiovascular Disease            | 0.539 | 0.479 - 0.599 | 0.203 |
| Duration of diabetes              | 0.545 | 0.485 - 0.604 | 0.143 |

AUC indicates area under the ROC curve; CI: 95% Confidence Interval;

| Serum Biomarkers | AUC   | 95% CI        | p                | Bonferroni-Holm correction |
|------------------|-------|---------------|------------------|----------------------------|
| S100AMRP8        | 0.514 | 0.454 - 0.574 | 0.651            | >0.999                     |
| Endostatin       | 0.586 | 0.527 - 0.644 | <b>0.005</b>     | 0.075                      |
| VAP-1            | 0.449 | 0.389 - 0.508 | 0.092            | >0.999                     |
| CXCL-16          | 0.696 | 0.643 - 0.750 | <b>&lt;0.001</b> | <b>&lt;0.001</b>           |
| sTNF-RI          | 0.573 | 0.514 - 0.632 | <b>0.016</b>     | 0.240                      |
| sTNF-RII         | 0.544 | 0.484 - 0.603 | 0.153            | >0.999                     |
| sST2             | 0.562 | 0.503 - 0.621 | <b>0.042</b>     | 0.630                      |
| sThrombomodulin  | 0.530 | 0.470 - 0.589 | 0.329            | >0.999                     |
| VEGF             | 0.541 | 0.481 - 0.601 | 0.178            | >0.999                     |
| RAGE             | 0.535 | 0.476 - 0.595 | 0.245            | >0.999                     |
| VEGF-R1          | 0.559 | 0.499 - 0.618 | 0.054            | 0.810                      |
| TGF- $\beta$ 1   | 0.669 | 0.612 - 0.726 | <b>&lt;0.001</b> | <b>&lt;0.001</b>           |
| Angiopoietin-2   | 0.658 | 0.602 - 0.714 | <b>&lt;0.001</b> | <b>&lt;0.001</b>           |
| Angiopoietin-1   | 0.484 | 0.425 - 0.544 | 0.611            | >0.999                     |
| MCP-1            | 0.590 | 0.531 - 0.649 | <b>0.003</b>     | <b>0.045</b>               |

AUC indicates area under the ROC curve; CI: 95% Confidence Interval;

**Supplementary Table 2a:** Spearman correlation coefficients between selected serum biomarker levels

| Biomarker      | CXCL-16 | TGF- $\beta$ 1 | Angiopoietin-2 | Endostatin     | sTNF-R1        |
|----------------|---------|----------------|----------------|----------------|----------------|
| CXCL-16        | -       | 0.374**        | 0.290**        | 0.170**        | 0.265**        |
| TGF- $\beta$ 1 | 0.374** | -              | 0.067          | 0.060          | -0.033         |
| Angiopoietin-2 | 0.290** | 0.067          | -              | 0.303**        | 0.337**        |
| Endostatin     | 0.170** | 0.060          | 0.303**        | -              | <b>0.519**</b> |
| sTNF-R1        | 0.265** | -0.033         | 0.337**        | <b>0.519**</b> | -              |

\*  $p < 0.05$ ; \*\*  $p < 0.01$ ; CXCL16: C-X-C Motif Chemokine Ligand 16; TGF $\beta$ -1: Transforming growth factor beta 1; sTNF-R1: soluble Tumor Necrosis Factor Receptor I.

**Supplementary Table 2b.** Spearman correlation coefficients between selected serum biomarker concentrations and clinical risk factors

| Biomarker      | MA      | Age     | Sex    | BMI     | Duration diabetes | Smoking status | Mean blood pressure | HbA <sub>1c</sub> | eGFR     | LDL    | UACR    | Cardiac complications |
|----------------|---------|---------|--------|---------|-------------------|----------------|---------------------|-------------------|----------|--------|---------|-----------------------|
| CXCL-16        | 0.343** | 0.060   | 0.102  | 0.215** | 0.079             | -0.023         | 0.027               | 0.073             | -0.129*  | 0.040  | 0.209** | 0.092                 |
| TGF- $\beta$ 1 | 0.294** | -0.077  | 0.129* | 0.093   | 0.093             | -0.084         | 0.057               | 0.114*            | 0.098    | 0.023  | 0.209** | 0.061                 |
| Angiopoietin-2 | 0.275** | -0.002  | 0.107* | 0.204** | 0.020             | 0.123*         | 0.008               | 0.014             | -0.014   | -0.019 | 0.138** | 0.093                 |
| Endostatin     | 0.147** | 0.218** | 0.024  | 0.093   | 0.087             | -0.007         | 0.043               | -0.103            | -0.274** | 0.069  | -0.056  | 0.033                 |
| sTNF-RI        | 0.125*  | 0.182** | -0.024 | 0.207** | 0.180**           | 0.052          | 0.046               | -0.010            | -0.246** | 0.030  | 0.008   | -0.017                |

\*  $p < 0.05$ ; \*\*  $p < 0.01$ ; CXCL16: C-X-C Motif Chemokine Ligand 16; TGF $\beta$ -1: Transforming growth factor beta 1; sTNF-RI: soluble Tumor Necrosis Factor Receptor I; MA: microalbuminuria; Cardiovascular disease was defined as history of coronary heart disease, myocardial infarction, stroke or transient ischemic attack, or peripheral vascular disease; eGFR: glomerular filtration rate (calculated with the use of the abbreviated Modification of Diet in Renal Disease formula); HbA<sub>1c</sub>: Glycated hemoglobin; LDL: low density lipoprotein; UACR: urine albumin creatinine ratio.

**Supplementary Table 3:** Clinical characteristics of the available datasets at baseline, split by presence or absence of olmesartan in the ROADMAP trial.

| Characteristics                            | Olmesartan<br>(n=86) | Placebo<br>(n=96) | P            |
|--------------------------------------------|----------------------|-------------------|--------------|
| <b>Demographic characteristics</b>         |                      |                   |              |
| Age                                        |                      |                   |              |
| Median - years (min-max)                   | 58 (36-75)           | 59 (33-74)        | 0.431        |
| Male sex - no. (%)                         | 45 (46.9)            | 50 (46.5)         | 0.961        |
| <b>Tobacco smoking - no. (%)</b>           |                      |                   |              |
| Non-smoker                                 | 57 (59.4)            | 49 (57.0)         | 0.866        |
| Current-smoker                             | 24 (25.0)            | 21 (24.4)         |              |
| Former-smoker                              | 15 (15.6)            | 16 (18.6)         |              |
| <b>Physical examination</b>                |                      |                   |              |
| Body-mass index†                           | 31.7 ± 4.8           | 32.2 ± 5.1        | 0.915        |
| Mean arterial blood pressure - mmHg        | 100.2 ± 10.8         | 99.8 ± 10.5       | 0.808        |
| <b>Laboratory values</b>                   |                      |                   |              |
| Estimated GFR - ml/min/1.73 m <sup>2</sup> | 86.6 ± 18.4          | 86.3 ± 16.0       | 0.829        |
| HbA <sub>1c</sub> - %                      | 8.1 ± 1.6            | 7.9 ± 1.6         | 0.323        |
| LDL cholesterol - mmol/l                   | 2.9 ± 1.0            | 3.3 ± 1.2         | <b>0.027</b> |
| Urine albumin-to-creatinine ratio - mg/g   | 10.5 ± 6.8           | 10.6 ± 8.3        | 0.585        |
| <b>Medical history</b>                     |                      |                   |              |
| Cardiovascular disease – no. (%)           | 11 (11.5)            | 11 (12.8)         | 0.783        |
| Duration of diabetes - months              | 85.1 ± 72.6          | 83.1 ± 71.2       | 0.673        |
| <b>Biomarkers</b>                          |                      |                   |              |
| CXCL-16 - ng/ml                            | 2.65 ± 0.58          | 2.68 ± 0.64       | 0.701        |
| TGF-β1 - ng/ml                             | 31.50 ± 33.25        | 33.25 ± 14.97     | 0.511        |
| Angiotensin-2 - ng/ml                      | 2.12 ± 1.22          | 2.13 ± 1.02       | 0.782        |
| Endostatin - ng/ml                         | 116.7 ± 41.16        | 111.4 ± 37.52     | 0.324        |
| sTNF-RI - ng/ml                            | 1.53 ± 0.72          | 1.44 ± 0.62       | 0.352        |

Data are presented as mean (SD) for normally distributed values, median (min-max) for skewed continuous values and n (%) for categorical values; Cardiovascular disease was defined as history of coronary heart disease, myocardial infarction, stroke or transient ischemic attack, or peripheral vascular disease; eGFR: glomerular filtration rate (calculated with the use of the abbreviated Modification of Diet in Renal Disease formula); HbA<sub>1c</sub>: Glycated hemoglobin; LDL: low density lipoprotein; †: The body-mass index is the weight in kilograms divided by the square of the height in meters.

**Supplementary Table 4:** Odds ratio (OR) for developing microalbuminuria before and after bootstrapped multivariate regression analysis

| Variable                          | Multivariate |               |                  | Bootstrap resampling |                         |                  |                |                              |
|-----------------------------------|--------------|---------------|------------------|----------------------|-------------------------|------------------|----------------|------------------------------|
|                                   | OR           | 95% CI        | P                | OR                   | BCa 95% CI <sup>a</sup> | P                | b <sup>a</sup> | SE <sub>b</sub> <sup>a</sup> |
| Age                               | 1.000        | 0.968 - 1.033 | 0.988            | 1.000                | -0.036 - 0.034          | 0.988            | 0.000          | 0.019                        |
| Sex                               | 0.681        | 0.403 - 1.149 | 0.150            | 0.681                | -0.962 - 0.137          | 0.150            | -0.384         | 0.301                        |
| BMI                               | 0.953        | 0.904 - 1.006 | 0.079            | 0.953                | -0.108 - 0.001          | 0.079            | -0.048         | 0.031                        |
| Smoking status                    | 0.930        | 0.662 - 1.306 | 0.674            | 0.930                | -0.438 - 0.283          | 0.674            | -0.073         | 0.191                        |
| Mean arterial pressure            | 0.995        | 0.972 - 1.019 | 0.685            | 0.995                | -0.030 - 0.018          | 0.685            | -0.005         | 0.013                        |
| Estimated GFR                     | 0.997        | 0.981 - 1.013 | 0.691            | 0.997                | -0.022 - 0.015          | 0.691            | -0.003         | 0.009                        |
| HbA <sub>1c</sub>                 | 0.938        | 0.797 - 1.103 | 0.436            | 0.938                | -0.256 - 0.103          | 0.436            | -0.064         | 0.095                        |
| LDL cholesterol                   | 0.971        | 0.768 - 1.227 | 0.806            | 0.971                | -0.275 - 0.214          | 0.806            | -0.029         | 0.129                        |
| Urine albumin-to-creatinine ratio | 0.996        | 0.963 - 1.030 | 0.817            | 0.996                | -0.047 - 0.037          | 0.817            | -0.004         | 0.020                        |
| Cardiovascular disease            | 1.516        | 0.703 - 3.271 | 0.288            | 1.516                | -0.459 - 10.389         | 0.288            | 0.416          | 0.434                        |
| Duration of diabetes              | 1.001        | 0.997 - 1.004 | 0.633            | 1.001                | -0.003 - 0.005          | 0.633            | 0.001          | 0.002                        |
| Duration of follow-up             | 0.992        | 0.977 - 1.006 | 0.248            | 0.992                | -0.025 - 0.007          | 0.248            | -0.009         | 0.008                        |
| CXCL-16                           | 2.603        | 1.705 - 3.957 | <b>&lt;0.001</b> | 2.603                | 0.472 - 10.626          | <b>&lt;0.001</b> | 0.957          | 0.233                        |
| TGF-β1                            | 1.026        | 1.010 - 1.042 | <b>0.001</b>     | 1.026                | 0.007 - 0.049           | <b>0.001</b>     | 0.025          | 0.009                        |
| Angiopietin-2                     | 1.504        | 1.141 - 1.983 | <b>0.004</b>     | 1.504                | 0.106 - 0.968           | <b>0.004</b>     | 0.408          | 0.177                        |

OR: odds ratio; CI: confidence interval; BCa CI: bias-corrected and accelerated (BCa) bootstrap interval; b: regression coefficients; SE<sub>b</sub>: standard error; a: bootstrap results are based on 10,000 bootstrap samples; CXCL16: C-X-C Motif Chemokine Ligand 16; TGFβ-1: Transforming growth factor beta 1; sTNF-R1: soluble Tumor Necrosis Factor Receptor I. Cardiovascular disease was defined as history of coronary heart disease, myocardial infarction, stroke or transient ischemic attack, or peripheral vascular disease; eGFR: glomerular filtration rate (calculated with the use of the abbreviated Modification of Diet in Renal Disease formula); HbA<sub>1c</sub>: Glycated hemoglobin; LDL: low density lipoprotein; UACR: urine albumin creatinine ratio.

**Supplementary Table 5:** Log-rank test of comparing the different quartiles of all 3 biomarkers associated with an increasing incidence of the composite outcome (de novo microalbuminuria).

| Log-rank text (Mantel-Cox)               | Q1     | Q2     | Q3     | Q4     |
|------------------------------------------|--------|--------|--------|--------|
| <b>CXCL-16-quartiles</b>                 |        |        |        |        |
| Q1 (< 1.953 ng/ml)                       | -      | <0.001 | <0.001 | <0.001 |
| Q2: (1.953 - 2.390 ng/ml)                | <0.001 | -      | 0.493  | 0.038  |
| Q3: (2.390 - 2.883 ng/ml)                | <0.001 | 0.493  | -      | 0.142  |
| Q4: (> 2.883 ng/ml)                      | <0.001 | 0.038  | 0.142  | -      |
| <b>TGF-<math>\beta</math>1-quartiles</b> |        |        |        |        |
| Q1 < 11.745 ng/ml)                       | -      | <0.001 | <0.001 | <0.001 |
| Q2: (11.745- 29.341 ng/ml)               | <0.001 | -      | 0.048  | 0.184  |
| Q3: (29.341- 40.575 ng/ml)               | <0.001 | 0.048  | -      | 0.939  |
| Q4: (> 40.575 ng/ml)                     | <0.001 | 0.184  | 0.939  | -      |
| <b>Angiopoietin-2-quartiles</b>          |        |        |        |        |
| Q1 (< 1.416 ng/ml)                       | -      | 0.017  | <0.001 | <0.001 |
| Q2: (1.416 - 1.831 ng/ml)                | 0.017  | -      | 0.035  | 0.079  |
| Q3: (1.831 - 2.378 ng/ml)                | <0.001 | 0.035  | -      | 0.739  |
| Q4: (> 2.378 ng/ml)                      | <0.001 | 0.079  | 0.739  | -      |



**Supplementary Table 6.** Calibration and sensitivity analysis of the risk prediction models

| Model   | Omnibus Tests | Nagelkerke's R <sup>2</sup> | Hosmer and Lemeshow Test |
|---------|---------------|-----------------------------|--------------------------|
| Model 1 | 0.096         | 0.068                       | 0.031                    |
| Model 2 | <0.001        | 0.235                       | 0.027                    |
| Model 3 | <0.001        | 0.267                       | 0.016                    |

**Model 1:** Age, Sex, BMI, Duration diabetes, Smoking status, Mean blood pressure, HbA<sub>1c</sub>, eGFR, LDL, Time of follow-up, UACR, Cardiac Complications

**Model 2:** CXCL16, TGFβ1, Angiopoietin-2

**Model 3:** Model 1 + 2

**Supplementary Table 7:** Prediction performance analysis for individual and combined biomarkers

| Models                                   | AUC                | 95% CI        | SEM   | NRI   | SEM   | Z     | P                |
|------------------------------------------|--------------------|---------------|-------|-------|-------|-------|------------------|
| Model 1                                  | 0.638              | 0.580 - 0.695 | 0.029 | -     | -     | -     | -                |
| Model 1 plus each biomarker individually |                    |               |       |       |       |       |                  |
| CXCL-16                                  | 0.715              | 0.662 - 0.767 | 0.027 | 0.238 | 0.059 | 4.002 | <b>&lt;0.001</b> |
| TGF- $\beta$ 1                           | 0.664              | 0.607 - 0.721 | 0.029 | 0.161 | 0.056 | 2.884 | <b>0.004</b>     |
| Angiopoietin-2                           | 0.678              | 0.623 - 0.733 | 0.028 | 0.215 | 0.043 | 5.043 | <b>&lt;0.001</b> |
| Model 3                                  | 0.760 <sup>a</sup> | 0.711 - 0.809 | 0.025 | 0.341 | 0.065 | 5.269 | <b>&lt;0.001</b> |

<sup>a</sup> P value for Delong test comparing biomarker plus clinical model to clinical model alone was <0,001; AUC: Area under the curve; SEM: Standard Error of the Mean; NRI: Net Reclassification Improvement; Z: z value (z statistic for NRI) and the corresponding p-Value (with alpha error set to 0.05).

**Model 1:** Age, Sex, BMI, Duration diabetes, Smoking status, Mean blood pressure, HbA<sub>1c</sub>, eGFR, LDL, Time of follow-up, UACR, Cardiovascular disease

**Model 2:** CXCL16, TGF $\beta$ 1, Angiopoietin2

**Model 3:** Model 1 + 2

**Supplementary Table 8:** Biomarkers of interest. Relevant clinical studies in patients with early stage cardiovascular disease or cardiovascular risk factors. Supposed pathways and underlying molecular mechanisms.

| Biomarker                      | Primary Pathway | Secondary pathway   | Molecular Mechanism                                                            | References  |
|--------------------------------|-----------------|---------------------|--------------------------------------------------------------------------------|-------------|
| <b>CXCL-16</b>                 | Inflammation    | Fibrosis            | Chemokine-Ligand of the CXCR6 Scavenger Receptor for oxidized LDL              | 1-4         |
| <b>ANGP-2</b>                  | Inflammation    | Angiogenesis        | Partial antagonist of Tie2                                                     | 5-14        |
| <b>TGF-<math>\beta</math>1</b> | Fibrosis        | Inflammation        | Strong pro-fibrotic growth factor                                              | 15-19       |
| <b>sVEGF-R1 (sFlt-1)</b>       | Angiogenesis    | Inflammation        | Antagonist of VEGF-A                                                           | 20-28       |
| <b>C1qR1 (sCD93)</b>           | Inflammation    | Apoptosis           | C-Type lectin-like domain signaling Monocytes and endothelial cells            | 29-31       |
| <b>Endostatin</b>              | Angiogenesis    | Fibrosis            | Inhibitor of Angiogenesis C-terminal fragment of collagen XVIII                | 32-37       |
| <b>Galectin-3</b>              | Fibrosis        | Inflammation        | Lectin signaling                                                               | 38-44       |
| <b>VAP-1</b>                   | Inflammation    | Oxidative stress    | Leukocyte trafficking Amine Oxidase                                            | 45-49       |
| <b>sThrombomodulin</b>         | Inflammation    | Coagulation         | Cofactor for activating Protein C Binding of HMGB-1                            | 50-58       |
| <b>MCP-1</b>                   | Inflammation    | Fibrosis            | Chemokine-Ligand of the CCR2                                                   | 59-65       |
| <b>sTNF-RII</b>                | Inflammation    | Fibrosis            | High affinity for the membrane-bound TNF. Restricted more to endothelial cells | 66-74       |
| <b>sTNF-RI</b>                 | Inflammation    | Fibrosis            | High affinity for the soluble form of TNFa                                     | 66-70,72-78 |
| <b>sST-2</b>                   | Inflammation    | Myocardial fibrosis | Decoy receptor of IL-33                                                        | 79-86       |
| <b>Osteopontin</b>             | Inflammation    | Calcification       | Cell adhesion and migration Macrophage & Lymphocyte activation                 | 87-90       |
| <b>S100A8</b>                  | Inflammation    | Angiogenesis        | Leukocyte trafficking                                                          | 91-95       |
| <b>RAGE</b>                    | Inflammation    | Oxidative stress    | Multiligand cell surface molecule belonging to the IG superfamily              | 95-100      |
| <b>VEGF-A</b>                  | Angiogenesis    | Inflammation        | Binds to VEGFR1 and VEGFR2                                                     | 101-103     |
| <b>ANGP-1</b>                  | Angiogenesis    | Inflammation        | Pure agonist of Tie2                                                           | 102-105     |
| <b>Copeptin</b>                | Inflammation    | Fluid homeostasis   | V1 (V1a & V1b) and V2 receptor agonist                                         | 106-113     |

CXCL16: C-X-C Motif Chemokine Ligand 16; TGF $\beta$ -1: Transforming growth factor beta 1; VEGF-R1: Vascular Endothelial Growth Factor-A Receptor 1; ANGP-2: Angiopoietin-2; C1qR1: Complement component C1q Receptor1; VAP-1: Vascular Adhesion Protein 1; MCP-1: Monocyte Chemotactic Protein 1; sTNF-RII: soluble Tumor Necrosis Factor Receptor II; sTNF-RI: soluble Tumor Necrosis Factor Receptor I; sST2: soluble ST2; S100A8/MRP8: S100 calcium binding protein A/Myeloid Related Protein 8; RAGE: Receptor for Advanced Glycation Endproducts; VEGF-A: Vascular Endothelial Growth Factor-A. C1qR1, Galectin-3, Osteopontin and Copeptin were measured but not included in the analysis due to the high proportion of missing values (>3% and >15%).

## References

1. Laugsand LE, Asvold BO, Vatten LJ, et al. Soluble CXCL16 and risk of myocardial infarction: The HUNT study in Norway. *Atherosclerosis*. 2016;244:188-194.
2. Jansson AM, Hartford M, Omland T, et al. Multimarker risk assessment including osteoprotegerin and CXCL16 in acute coronary syndromes. *Arterioscler Thromb Vasc Biol*. 2012;32(12):3041-3049.
3. Lehrke M, Millington SC, Lefterova M, et al. CXCL16 is a marker of inflammation, atherosclerosis, and acute coronary syndromes in humans. *J Am Coll Cardiol*. 2007;49(4):442-449.
4. Chen G, Lin SC, Chen J, et al. CXCL16 recruits bone marrow-derived fibroblast precursors in renal fibrosis. *J Am Soc Nephrol*. 2011;22(10):1876-1886.
5. Lim HS, Lip GY, Blann AD. Angiopoietin-1 and angiopoietin-2 in diabetes mellitus: Relationship to VEGF, glycaemic control, endothelial damage/dysfunction and atherosclerosis. *Atherosclerosis*. 2005;180(1):113-118.
6. Lopez-Mejias R, Corrales A, Genre F, et al. Angiopoietin-2 serum levels correlate with severity, early onset and cardiovascular disease in patients with rheumatoid arthritis. *Clin Exp Rheumatol*. 2013;31(5):761-766.
7. David S, Kumpers P, Lukasz A, et al. Circulating angiopoietin-2 levels increase with progress of chronic kidney disease. *Nephrol Dial Transplant*. 2010;25(8):2571-2576.
8. David S, Kumpers P, Lukasz A, Kielstein JT, Haller H, Fliser D. Circulating angiopoietin-2 in essential hypertension: Relation to atherosclerosis, vascular inflammation, and treatment with olmesartan/pravastatin. *J Hypertens*. 2009;27(8):1641-1647.

9. Chang FC, Lai TS, Chiang CK, et al. Angiopoietin-2 is associated with albuminuria and microinflammation in chronic kidney disease. *PLoS One*. 2013;8(3):e54668.
10. Chen S, Li H, Zhang C, et al. Urinary angiopoietin-2 is associated with albuminuria in patients with type 2 diabetes mellitus. *Int J Endocrinol*. 2015;2015:163120.
11. Theelen TL, Lappalainen JP, Sluimer JC, et al. Angiopoietin-2 blocking antibodies reduce early atherosclerotic plaque development in mice. *Atherosclerosis*. 2015;241(2):297-304.
12. Farhat N, Thorin-Trescases N, Mamarbachi M, et al. Angiopoietin-like 2 promotes atherogenesis in mice. *J Am Heart Assoc*. 2013;2(3):e000201.
13. Davis B, Dei Cas A, Long DA, et al. Podocyte-specific expression of angiopoietin-2 causes proteinuria and apoptosis of glomerular endothelia. *J Am Soc Nephrol*. 2007;18(8):2320-2329.
14. Gnudi L. Angiopoietins and diabetic nephropathy. *Diabetologia*. 2016;59(8):1616-1620.
15. Mehta T, Buzkova P, Kizer JR, et al. Higher plasma transforming growth factor (TGF)-beta is associated with kidney disease in older community dwelling adults. *BMC Nephrol*. 2017;18(1):98-017-0509-6.
16. Qiao YC, Shen J, Hong XZ, et al. Changes of regulatory T cells, transforming growth factor-beta and interleukin-10 in patients with type 1 diabetes mellitus: A systematic review and meta-analysis. *Clin Immunol*. 2016;170:61-69.
17. Qiao YC, Chen YL, Pan YH, et al. Changes of transforming growth factor beta 1 in patients with type 2 diabetes and diabetic nephropathy: A PRISMA-compliant systematic review and meta-analysis. *Medicine (Baltimore)*. 2017;96(15):e6583.
18. Ha SW, Kim HJ, Bae JS, et al. Elevation of urinary betaig-h3, transforming growth factor-beta-induced protein in patients with type 2 diabetes and nephropathy. *Diabetes Res Clin Pract*. 2004;65(2):167-173.
19. Ziyadeh FN, Hoffman BB, Han DC, et al. Long-term prevention of renal insufficiency, excess matrix gene expression, and glomerular mesangial matrix expansion by treatment with monoclonal antitransforming growth factor-beta antibody in db/db diabetic mice. *Proc Natl Acad Sci U S A*. 2000;97(14):8015-8020.
20. Matsui M, Takeda Y, Uemura S, et al. Suppressed soluble fms-like tyrosine kinase-1 production aggravates atherosclerosis in chronic kidney disease. *Kidney Int*. 2014;85(2):393-403.
21. Rambod M, Heine GH, Seiler S, et al. Association of vascular endothelial factors with cardiovascular outcome and mortality in chronic kidney disease patients: A 4-year cohort study. *Atherosclerosis*. 2014;236(2):360-365.
22. Edelbauer M, Kshirsagar S, Riedl M, et al. Soluble VEGF receptor 1 promotes endothelial injury in children and adolescents with lupus nephritis. *Pediatr Nephrol*. 2012;27(5):793-800.
23. Onoue K, Uemura S, Takeda Y, et al. Reduction of circulating soluble fms-like tyrosine kinase-1 plays a significant role in renal dysfunction-associated aggravation of atherosclerosis. *Circulation*. 2009;120(24):2470-2477.
24. Pandey AK, Singhi EK, Arroyo JP, et al. Mechanisms of VEGF (vascular endothelial growth factor) inhibitor-associated hypertension and vascular disease. *Hypertension*. 2018;71(2):e1-e8.
25. Jin J, Sison K, Li C, et al. Soluble FLT1 binds lipid microdomains in podocytes to control cell morphology and glomerular barrier function. *Cell*. 2012;151(2):384-399.
26. Ku CH, White KE, Dei Cas A, et al. Inducible overexpression of sFlt-1 in podocytes ameliorates glomerulopathy in diabetic mice. *Diabetes*. 2008;57(10):2824-2833.
27. Seno A, Takeda Y, Matsui M, et al. Suppressed production of soluble fms-like tyrosine kinase-1 contributes to myocardial remodeling and heart failure. *Hypertension*. 2016;68(3):678-687.
28. Wu FT, Stefanini MO, Mac Gabhann F, Kontos CD, Annex BH, Popel AS. A systems biology perspective on sVEGFR1: Its biological function, pathogenic role and therapeutic use. *J Cell Mol Med*. 2010;14(3):528-552.
29. Strawbridge RJ, Hilding A, Silveira A, et al. Soluble CD93 is involved in metabolic dysregulation but does not influence carotid intima-media thickness. *Diabetes*. 2016;65(10):2888-2899.
30. Malarstig A, Silveira A, Wagsater D, et al. Plasma CD93 concentration is a potential novel biomarker for coronary artery disease. *J Intern Med*. 2011;270(3):229-236.
31. Youn JC, Yu HT, Jeon JW, et al. Soluble CD93 levels in patients with acute myocardial infarction and its implication on clinical outcome. *PLoS One*. 2014;9(5):e96538.

32. Carlsson AC, Ruge T, Sundstrom J, et al. Association between circulating endostatin, hypertension duration, and hypertensive target-organ damage. *Hypertension*. 2013;62(6):1146-1151.
33. Arnlov J, Ruge T, Ingelsson E, Larsson A, Sundstrom J, Lind L. Serum endostatin and risk of mortality in the elderly: Findings from 2 community-based cohorts. *Arterioscler Thromb Vasc Biol*. 2013;33(11):2689-2695.
34. Carlsson AC, Ostgren CJ, Lanne T, Larsson A, Nystrom FH, Arnlov J. The association between endostatin and kidney disease and mortality in patients with type 2 diabetes. *Diabetes Metab*. 2016;42(5):351-357.
35. Ruge T, Carlsson AC, Larsson TE, et al. Endostatin level is associated with kidney injury in the elderly: Findings from two community-based cohorts. *Am J Nephrol*. 2014;40(5):417-424.
36. Hamano Y, Okude T, Shirai R, et al. Lack of collagen XVIII/endostatin exacerbates immune-mediated glomerulonephritis. *J Am Soc Nephrol*. 2010;21(9):1445-1455.
37. Lin CH, Chen J, Zhang Z, et al. Endostatin and transglutaminase 2 are involved in fibrosis of the aging kidney. *Kidney Int*. 2016;89(6):1281-1292.
38. Madrigal-Matute J, Lindholt JS, Fernandez-Garcia CE, et al. Galectin-3, a biomarker linking oxidative stress and inflammation with the clinical outcomes of patients with atherothrombosis. *J Am Heart Assoc*. 2014;3(4):10.1161/JAHA.114.000785.
39. McEvoy JW, Chen Y, Halushka MK, et al. Galectin-3 and risk of heart failure and death in blacks and whites. *J Am Heart Assoc*. 2016;5(5):10.1161/JAHA.115.003079.
40. Rebholz CM, Selvin E, Liang M, et al. Plasma galectin-3 levels are associated with the risk of incident chronic kidney disease. *Kidney Int*. 2018;93(1):252-259.
41. Gleissner CA, Erbel C, Linden F, et al. Galectin-3 binding protein, coronary artery disease and cardiovascular mortality: Insights from the LURIC study. *Atherosclerosis*. 2017;260:121-129.
42. Fashanu OE, Norby FL, Aguilar D, et al. Galectin-3 and incidence of atrial fibrillation: The atherosclerosis risk in communities (ARIC) study. *Am Heart J*. 2017;192:19-25.
43. Bansal N, Katz R, Seliger S, et al. Galectin-3 and soluble ST2 and kidney function decline in older adults: The cardiovascular health study (CHS). *Am J Kidney Dis*. 2016;67(6):994-996.
44. Martinez-Martinez E, Ibarrola J, Fernandez-Celis A, et al. Galectin-3 pharmacological inhibition attenuates early renal damage in spontaneously hypertensive rats. *J Hypertens*. 2017.
45. Li HY, Jiang YD, Chang TJ, et al. Serum vascular adhesion protein-1 predicts 10-year cardiovascular and cancer mortality in individuals with type 2 diabetes. *Diabetes*. 2011;60(3):993-999.
46. Aalto K, Maksimow M, Juonala M, et al. Soluble vascular adhesion protein-1 correlates with cardiovascular risk factors and early atherosclerotic manifestations. *Arterioscler Thromb Vasc Biol*. 2012;32(2):523-532.
47. Maciorkowska D, Zbroch E, Malyszko J. Circulating reninase, catecholamines, and vascular adhesion protein 1 in hypertensive patients. *J Am Soc Hypertens*. 2015;9(11):855-864.
48. Aalto K, Havulinna AS, Jalkanen S, Salomaa V, Salmi M. Soluble vascular adhesion protein-1 predicts incident major adverse cardiovascular events and improves reclassification in a Finnish prospective cohort study. *Circ Cardiovasc Genet*. 2014;7(4):529-535.
49. Tanaka S, Tanaka T, Kawakami T, et al. Vascular adhesion protein-1 enhances neutrophil infiltration by generation of hydrogen peroxide in renal ischemia/reperfusion injury. *Kidney Int*. 2017;92(1):154-164.
50. Salomaa V, Matei C, Aleksic N, et al. Soluble thrombomodulin as a predictor of incident coronary heart disease and symptomless carotid artery atherosclerosis in the atherosclerosis risk in communities (ARIC) study: A case-cohort study. *Lancet*. 1999;353(9166):1729-1734.
51. Wu KK, Aleksic N, Ballantyne CM, Ahn C, Juneja H, Boerwinkle E. Interaction between soluble thrombomodulin and intercellular adhesion molecule-1 in predicting risk of coronary heart disease. *Circulation*. 2003;107(13):1729-1732.
52. Iwashima Y, Sato T, Watanabe K, et al. Elevation of plasma thrombomodulin level in diabetic patients with early diabetic nephropathy. *Diabetes*. 1990;39(8):983-988.
53. Igari K, Kudo T, Toyofuku T, Inoue Y. The relationship between endothelial dysfunction and endothelial cell markers in peripheral arterial disease. *PLoS One*. 2016;11(11):e0166840.
54. Wang Y, Jia PY, Chen BJ, et al. Evaluation of plasma thrombomodulin in patients with coronary slow flow. *Cardiology*. 2017;138(3):141-146.

55. Xu J, Jin J, Tan S. Association of thrombomodulin gene polymorphisms with susceptibility to atherosclerotic diseases: A meta-analysis. *Ann Hum Genet.* 2016;80(3):172-181.
56. Arnett DK, McClelland RL, Bank A, et al. Biomarkers of inflammation and hemostasis associated with left ventricular mass: The multiethnic study of atherosclerosis (MESA). *Int J Mol Epidemiol Genet.* 2011;2(4):391-400.
57. Rajashekhar G, Gupta A, Marin A, et al. Soluble thrombomodulin reduces inflammation and prevents microalbuminuria induced by chronic endothelial activation in transgenic mice. *Am J Physiol Renal Physiol.* 2012;302(6):F703-12.
58. Lai CH, Wang KC, Kuo CH, et al. Recombinant adeno-associated virus vector carrying the thrombomodulin lectin-like domain for the treatment of abdominal aortic aneurysm. *Atherosclerosis.* 2017;262:62-70.
59. Szalai C, Duba J, Prohaszka Z, et al. Involvement of polymorphisms in the chemokine system in the susceptibility for coronary artery disease (CAD). coincidence of elevated lip(a) and MCP-1 -2518 G/G genotype in CAD patients. *Atherosclerosis.* 2001;158(1):233-239.
60. Kim MP, Wahl LM, Yanek LR, Becker DM, Becker LC. A monocyte chemoattractant protein-1 gene polymorphism is associated with occult ischemia in a high-risk asymptomatic population. *Atherosclerosis.* 2007;193(2):366-372.
61. Ding D, Su D, Li X, et al. Serum levels of monocyte chemoattractant protein-1 and all-cause and cardiovascular mortality among patients with coronary artery disease. *PLoS One.* 2015;10(3):e0120633.
62. Sardo MA, Campo S, Mandraffino G, et al. Tissue factor and monocyte chemoattractant protein-1 expression in hypertensive individuals with normal or increased carotid intima-media wall thickness. *Clin Chem.* 2008;54(5):814-823.
63. Deshmane SL, Kremlev S, Amini S, Sawaya BE. Monocyte chemoattractant protein-1 (MCP-1): An overview. *J Interferon Cytokine Res.* 2009;29(6):313-326.
64. Cipollone F, Marini M, Fazio M, et al. Elevated circulating levels of monocyte chemoattractant protein-1 in patients with restenosis after coronary angioplasty. *Arterioscler Thromb Vasc Biol.* 2001;21(3):327-334.
65. Han JH, Oh TJ, Lee G, et al. The beneficial effects of empagliflozin, an SGLT2 inhibitor, on atherosclerosis in ApoE (-/-) mice fed a western diet. *Diabetologia.* 2017;60(2):364-376.
66. Gohda T, Niewczas MA, Ficociello LH, et al. Circulating TNF receptors 1 and 2 predict stage 3 CKD in type 1 diabetes. *J Am Soc Nephrol.* 2012;23(3):516-524.
67. Niewczas MA, Gohda T, Skupien J, et al. Circulating TNF receptors 1 and 2 predict ESRD in type 2 diabetes. *J Am Soc Nephrol.* 2012;23(3):507-515.
68. Carlsson AC, Larsson TE, Helmersson-Karlqvist J, Larsson A, Lind L, Arnlov J. Soluble TNF receptors and kidney dysfunction in the elderly. *J Am Soc Nephrol.* 2014;25(6):1313-1320.
69. Coca SG, Nadkarni GN, Huang Y, et al. Plasma biomarkers and kidney function decline in early and established diabetic kidney disease. *J Am Soc Nephrol.* 2017;28(9):2786-2793.
70. Al-Lamki RS, Mayadas TN. TNF receptors: Signaling pathways and contribution to renal dysfunction. *Kidney Int.* 2015;87(2):281-296.
71. Bradley JR. TNF-mediated inflammatory disease. *J Pathol.* 2008;214(2):149-160.
72. Guo G, Morrissey J, McCracken R, Tolley T, Klahr S. Role of TNFR1 and TNFR2 receptors in tubulointerstitial fibrosis of obstructive nephropathy. *Am J Physiol.* 1999;277(5 Pt 2):F766-72.
73. Svenungsson E, Fei GZ, Jensen-Urstad K, de Faire U, Hamsten A, Frostegard J. TNF-alpha: A link between hypertriglyceridaemia and inflammation in SLE patients with cardiovascular disease. *Lupus.* 2003;12(6):454-461.
74. Pavkov ME, Weil EJ, Fufaa GD, et al. Tumor necrosis factor receptors 1 and 2 are associated with early glomerular lesions in type 2 diabetes. *Kidney Int.* 2016;89(1):226-234.
75. Schnabel RB, Yin X, Larson MG, et al. Multiple inflammatory biomarkers in relation to cardiovascular events and mortality in the community. *Arterioscler Thromb Vasc Biol.* 2013;33(7):1728-1733.
76. Feldman AM, Mann DL, She L, et al. Prognostic significance of biomarkers in predicting outcome in patients with coronary artery disease and left ventricular dysfunction: Results of the biomarker substudy of the surgical treatment for ischemic heart failure trials. *Circ Heart Fail.* 2013;6(3):461-472.

77. Takei Y, Di Tullio MR, Homma S, et al. Soluble tumor necrosis factor receptor 1 level is associated with left ventricular hypertrophy: The northern manhattan study. *Am J Hypertens.* 2009;22(7):763-769.
78. Saulnier PJ, Gand E, Ragot S, et al. Association of serum concentration of TNFR1 with all-cause mortality in patients with type 2 diabetes and chronic kidney disease: Follow-up of the SURDIAGENE cohort. *Diabetes Care.* 2014;37(5):1425-1431.
79. Caporali A, Meloni M, Miller AM, et al. Soluble ST2 is regulated by p75 neurotrophin receptor and predicts mortality in diabetic patients with critical limb ischemia. *Arterioscler Thromb Vasc Biol.* 2012;32(12):e149-60.
80. Miller AM, Purves D, McConnachie A, et al. Soluble ST2 associates with diabetes but not established cardiovascular risk factors: A new inflammatory pathway of relevance to diabetes? *PLoS One.* 2012;7(10):e47830.
81. Ho JE, Larson MG, Ghorbani A, et al. Soluble ST2 predicts elevated SBP in the community. *J Hypertens.* 2013;31(7):1431-6; discussion 1436.
82. Xanthakis V, Larson MG, Wollert KC, et al. Association of novel biomarkers of cardiovascular stress with left ventricular hypertrophy and dysfunction: Implications for screening. *J Am Heart Assoc.* 2013;2(6):e000399.
83. Wang TJ, Wollert KC, Larson MG, et al. Prognostic utility of novel biomarkers of cardiovascular stress: The framingham heart study. *Circulation.* 2012;126(13):1596-1604.
84. Gopal DM, Larson MG, Januzzi JL, et al. Biomarkers of cardiovascular stress and subclinical atherosclerosis in the community. *Clin Chem.* 2014;60(11):1402-1408.
85. Pascual-Figal DA, Januzzi JL. The biology of ST2: The international ST2 consensus panel. *Am J Cardiol.* 2015;115(7 Suppl):3B-7B.
86. Kumar S, Tzimas MN, Griswold DE, Young PR. Expression of ST2, an interleukin-1 receptor homologue, is induced by proinflammatory stimuli. *Biochem Biophys Res Commun.* 1997;235(3):474-478.
87. Feldreich T, Carlsson AC, Helmersson-Karlqvist J, et al. Urinary osteopontin predicts incident chronic kidney disease, while plasma osteopontin predicts cardiovascular death in elderly men. *Cardiorenal Med.* 2017;7(3):245-254.
88. Abdalrhim AD, Marroush TS, Austin EE, et al. Plasma osteopontin levels and adverse cardiovascular outcomes in the PEACE trial. *PLoS One.* 2016;11(6):e0156965.
89. Berezin AE, Kremzer AA, Samura TA, Berezina TA, Martovitskaya YV. Serum uric acid predicts declining of circulating proangiogenic mononuclear progenitor cells in chronic heart failure patients. *J Cardiovasc Thorac Res.* 2014;6(3):153-162.
90. Ding Y, Chen J, Cui G, et al. Pathophysiological role of osteopontin and angiotensin II in atherosclerosis. *Biochem Biophys Res Commun.* 2016;471(1):5-9.
91. Cotoi OS, Duner P, Ko N, et al. Plasma S100A8/A9 correlates with blood neutrophil counts, traditional risk factors, and cardiovascular disease in middle-aged healthy individuals. *Arterioscler Thromb Vasc Biol.* 2014;34(1):202-210.
92. Abbas A, Aukrust P, Dahl TB, et al. High levels of S100A12 are associated with recent plaque symptomatology in patients with carotid atherosclerosis. *Stroke.* 2012;43(5):1347-1353.
93. Oesterle A, Bowman MA. S100A12 and the S100/calgranulins: Emerging biomarkers for atherosclerosis and possibly therapeutic targets. *Arterioscler Thromb Vasc Biol.* 2015;35(12):2496-2507.
94. Most P, Lerchenmuller C, Rengo G, et al. S100A1 deficiency impairs postischemic angiogenesis via compromised proangiogenic endothelial cell function and nitric oxide synthase regulation. *Circ Res.* 2013;112(1):66-78.
95. Kraakman MJ, Lee MK, Al-Sharea A, et al. Neutrophil-derived S100 calcium-binding proteins A8/A9 promote reticulated thrombocytosis and atherogenesis in diabetes. *J Clin Invest.* 2017;127(6):2133-2147.
96. Soro-Paavonen A, Watson AM, Li J, et al. Receptor for advanced glycation end products (RAGE) deficiency attenuates the development of atherosclerosis in diabetes. *Diabetes.* 2008;57(9):2461-2469.
97. Ren X, Ren L, Wei Q, Shao H, Chen L, Liu N. Advanced glycation end-products decreases expression of endothelial nitric oxide synthase through oxidative stress in human coronary artery endothelial cells. *Cardiovasc Diabetol.* 2017;16(1):52-017-0531-9.
98. D'Agati V, Schmidt AM. RAGE and the pathogenesis of chronic kidney disease. *Nat Rev Nephrol.* 2010;6(6):352-360.

99. Harcourt BE, Sourris KC, Coughlan MT, et al. Targeted reduction of advanced glycation improves renal function in obesity. *Kidney Int.* 2011;80(2):190-198.
100. de Vos LC, Mulder DJ, Smit AJ, et al. Skin autofluorescence is associated with 5-year mortality and cardiovascular events in patients with peripheral artery disease. *Arterioscler Thromb Vasc Biol.* 2014;34(4):933-938.
101. Eaton CB, Gramling R, Parker DR, Roberts MB, Lu B, Ridker PM. Prospective association of vascular endothelial growth factor-A (VEGF-A) with coronary heart disease mortality in southeastern new england. *Atherosclerosis.* 2008;200(1):221-227.
102. Dessapt-Baradez C, Woolf AS, White KE, et al. Targeted glomerular angiotensin-1 therapy for early diabetic kidney disease. *J Am Soc Nephrol.* 2014;25(1):33-42.
103. Anisimov A, Tvorogov D, Alitalo A, et al. Vascular endothelial growth factor-angiopoietin chimera with improved properties for therapeutic angiogenesis. *Circulation.* 2013;127(4):424-434.
104. Ahmad S, Cudmore MJ, Wang K, et al. Angiotensin-1 induces migration of monocytes in a tie-2 and integrin-independent manner. *Hypertension.* 2010;56(3):477-483.
105. Post S, Peeters W, Busser E, et al. Balance between angiotensin-1 and angiotensin-2 is in favor of angiotensin-2 in atherosclerotic plaques with high microvessel density. *J Vasc Res.* 2008;45(3):244-250.
106. De Marchis GM, Weck A, Audebert H, et al. Copeptin for the prediction of recurrent cerebrovascular events after transient ischemic attack: Results from the CoRisk study. *Stroke.* 2014;45(10):2918-2923.
107. Khan SQ, Dhillon OS, O'Brien RJ, et al. C-terminal pro-angiotensin (copeptin) as a novel and prognostic marker in acute myocardial infarction: Leicester acute myocardial infarction peptide (LAMP) study. *Circulation.* 2007;115(16):2103-2110.
108. Abbasi A, Corpeleijn E, Meijer E, et al. Sex differences in the association between plasma copeptin and incident type 2 diabetes: The prevention of renal and vascular endstage disease (PREVEND) study. *Diabetologia.* 2012;55(7):1963-1970.
109. Saleem U, Khaleghi M, Morgenthaler NG, et al. Plasma carboxy-terminal pro-angiotensin (copeptin): A novel marker of insulin resistance and metabolic syndrome. *J Clin Endocrinol Metab.* 2009;94(7):2558-2564.
110. Hu W, Ni YJ, Ma L, Hao HR, Chen L, Yu WN. Serum copeptin as a new biomarker in the early diagnosis of decline in renal function of type 2 diabetes mellitus patients. *Int J Clin Exp Med.* 2015;8(6):9730-9736.
111. Meijer E, Bakker SJ, Halbesma N, de Jong PE, Struck J, Gansevoort RT. Copeptin, a surrogate marker of angiotensin, is associated with microalbuminuria in a large population cohort. *Kidney Int.* 2010;77(1):29-36.
112. Latronico N, Castioni CA. Copeptin in critical illness. *Clin Chem Lab Med.* 2014;52(10):1391-1393.
113. Enhorning S, Christensson A, Melander O. Plasma copeptin as a predictor of kidney disease. *Nephrol Dial Transplant.* 2018.



**Modified STROBE Statement—checklist of items that should be included in reports of observational studies (Cohort/Cross-sectional and case-control studies)**

|                           | Item No | Recommendation                                                                                                                                                                                                                                                                                                                                                                                                                                                                 | Reported on Page No               |
|---------------------------|---------|--------------------------------------------------------------------------------------------------------------------------------------------------------------------------------------------------------------------------------------------------------------------------------------------------------------------------------------------------------------------------------------------------------------------------------------------------------------------------------|-----------------------------------|
| <b>Title and abstract</b> | 1       | (a) Indicate the study's design with a commonly used term in the title or the abstract                                                                                                                                                                                                                                                                                                                                                                                         | Page 1-2                          |
|                           |         | (b) Provide in the abstract an informative and balanced summary of what was done and what was found                                                                                                                                                                                                                                                                                                                                                                            | Page 2                            |
| <b>Introduction</b>       |         |                                                                                                                                                                                                                                                                                                                                                                                                                                                                                |                                   |
| Background/rationale      | 2       | Explain the scientific background and rationale for the investigation being reported                                                                                                                                                                                                                                                                                                                                                                                           | Page 3                            |
| Objectives                | 3       | State specific objectives, including any prespecified hypotheses                                                                                                                                                                                                                                                                                                                                                                                                               | Page 3                            |
| <b>Methods</b>            |         |                                                                                                                                                                                                                                                                                                                                                                                                                                                                                |                                   |
| Study design              | 4       | Present key elements of study design early in the paper                                                                                                                                                                                                                                                                                                                                                                                                                        | Page 4                            |
| Setting                   | 5       | Describe the setting, locations, and relevant dates, including periods of recruitment, exposure, follow-up, and data collection                                                                                                                                                                                                                                                                                                                                                | Page 4-5                          |
| Participants              | 6       | (a) <i>Cohort study</i> —Give the eligibility criteria, and the sources and methods of selection of participants. Describe methods of follow-up<br>(b) <i>Case-control study</i> —Give the eligibility criteria, and the sources and methods of case ascertainment and control selection. Give the rationale for the choice of cases and controls<br>(c) <i>Cross-sectional study</i> —Give the eligibility criteria, and the sources and methods of selection of participants | Page 4-5                          |
| Variables                 | 7       | Clearly define all outcomes, exposures, predictors, potential confounders, and effect modifiers. Give diagnostic criteria, if applicable                                                                                                                                                                                                                                                                                                                                       | Page 4-5                          |
| Data sources/measurement  | 8*      | For each variable of interest, give sources of data and details of methods of assessment (measurement).                                                                                                                                                                                                                                                                                                                                                                        | Page 5-6<br>Supplementary Table 6 |
| Bias                      | 9       | Describe any efforts to address potential sources of bias                                                                                                                                                                                                                                                                                                                                                                                                                      | Page 4-6<br>Page 9-12             |
| Study size                | 10      | Explain how the study size was arrived at (if applicable)                                                                                                                                                                                                                                                                                                                                                                                                                      | Page 4                            |
| Quantitative variables    | 11      | Explain how quantitative variables were handled in the analyses. If applicable, describe which groupings were chosen and why                                                                                                                                                                                                                                                                                                                                                   | Page 4-6                          |
| Statistical methods       | 12      | (a) Describe all statistical methods, including those used to control for confounding                                                                                                                                                                                                                                                                                                                                                                                          | Page 6-7                          |
|                           |         | (b) Describe any methods used to examine subgroups and interactions                                                                                                                                                                                                                                                                                                                                                                                                            | Page 6-7                          |
|                           |         | (c) Explain how missing data were addressed                                                                                                                                                                                                                                                                                                                                                                                                                                    | Page 6-7                          |
|                           |         | (d) <i>Cohort study</i> —If applicable, explain how loss to follow-up was addressed<br><i>Case-control study</i> —If applicable, explain how matching of cases and controls was addressed<br><i>Cross-sectional study</i> —If applicable, describe analytical methods taking account of sampling strategy                                                                                                                                                                      | Page 4                            |
|                           |         | (e) Describe any sensitivity analyses                                                                                                                                                                                                                                                                                                                                                                                                                                          | Page 6-7                          |
| <b>Results</b>            |         |                                                                                                                                                                                                                                                                                                                                                                                                                                                                                |                                   |
| Participants              | 13*     | (a) Report numbers of individuals at each stage of study—eg numbers potentially eligible, examined for                                                                                                                                                                                                                                                                                                                                                                         | Page 8                            |

|                   |     |                                                                                                                                                                                                              |                        |
|-------------------|-----|--------------------------------------------------------------------------------------------------------------------------------------------------------------------------------------------------------------|------------------------|
|                   |     | eligibility, confirmed eligible, included in the study, completing follow-up, and analyzed                                                                                                                   |                        |
|                   |     | (c) <b>Use of a flow diagram</b>                                                                                                                                                                             | Supplementary Figure 1 |
| Descriptive data  | 14* | (a) Give characteristics of study participants (eg demographic, clinical, social) and information on exposures and potential confounders                                                                     | Page 8<br>Table 1      |
|                   |     | (b) Indicate number of participants with missing data for each variable of interest                                                                                                                          | Page 4-6               |
|                   |     | (c) <i>Cohort study</i> —Summarise follow-up time (eg, average and total amount)                                                                                                                             | Page 4                 |
| Outcome data      | 15* | <i>Cohort study</i> —Report numbers of outcome events or summary measures over time                                                                                                                          | -                      |
|                   |     | <i>Case-control study</i> —Report numbers in each exposure category, or summary measures of exposure                                                                                                         | Page 8-10              |
|                   |     | <i>Cross-sectional study</i> —Report numbers of outcome events or summary measures                                                                                                                           | -                      |
| Main results      | 16  | (a) Give unadjusted estimates and, if applicable, confounder-adjusted estimates and their precision (eg, 95% confidence interval). Make clear which confounders were adjusted for and why they were included | Page 8-10              |
| Other analyses    | 17  | Report other analyses done—eg analyses of subgroups and interactions, and sensitivity analyses                                                                                                               | Page 8-10              |
| <b>Discussion</b> |     |                                                                                                                                                                                                              |                        |
| Key results       | 18  | Summarise key results with reference to study objectives                                                                                                                                                     | Page 10-13             |
| Limitations       | 19  | Discuss limitations of the study, taking into account sources of potential bias or imprecision. Discuss both direction and magnitude of any potential bias                                                   | Page 10-13             |
| Interpretation    | 20  | Give a cautious overall interpretation of results considering objectives, limitations, multiplicity of analyses, results from similar studies, and other relevant evidence                                   | Page 10-13             |
| Generalisability  | 21  | Discuss the generalisability (external validity) of the study results                                                                                                                                        | Page 10-13             |

\*Give information separately for cases and controls in case-control studies and, if applicable, for exposed and unexposed groups in cohort and cross-sectional studies.

**Note:** An Explanation and Elaboration article discusses each checklist item and gives methodological background and published examples of transparent reporting. The STROBE checklist is best used in conjunction with this article (freely available on the Web sites of PLoS Medicine at <http://www.plosmedicine.org/>, Annals of Internal Medicine at <http://www.annals.org/>, and Epidemiology at <http://www.epidem.com/>). Information on the STROBE Initiative is available at [www.strobe-statement.org](http://www.strobe-statement.org).
